# Supplementary material for: Nano-ZrO2-Catalyzed Biginelli Reaction and the Synthesis of Bioactive Dihydropyrimidinones That Targets PPAR-γ in Human Breast Cancer Cells
Source: MDPI journal article supplement (doi:10.3390/catal13020228), 2023-01-18
Supplement: s1 [file s1]

# **Nano-ZrO<sub>2</sub>-Catalyzed Biginelli Reaction and the Synthesis of Bioactive Dihydropyrimidinones That Targets PPAR- $\gamma$ in Human Breast Cancer Cells**

Suresha N. Deveshegowda, Ji-Rui Yang, Zhang Xi, Omantheswara Nagaraja, Kashifa Fazl-Ur-Rahman, Bhanuprakash C. Narasimhachar, Gautam Sethi, Ganga Periyasamy, Mahendra Madegowda, Shobith Rangappa, Vijay Pandey, Peter E. Lobie and Basappa Basappa

## **Supplementary Data**

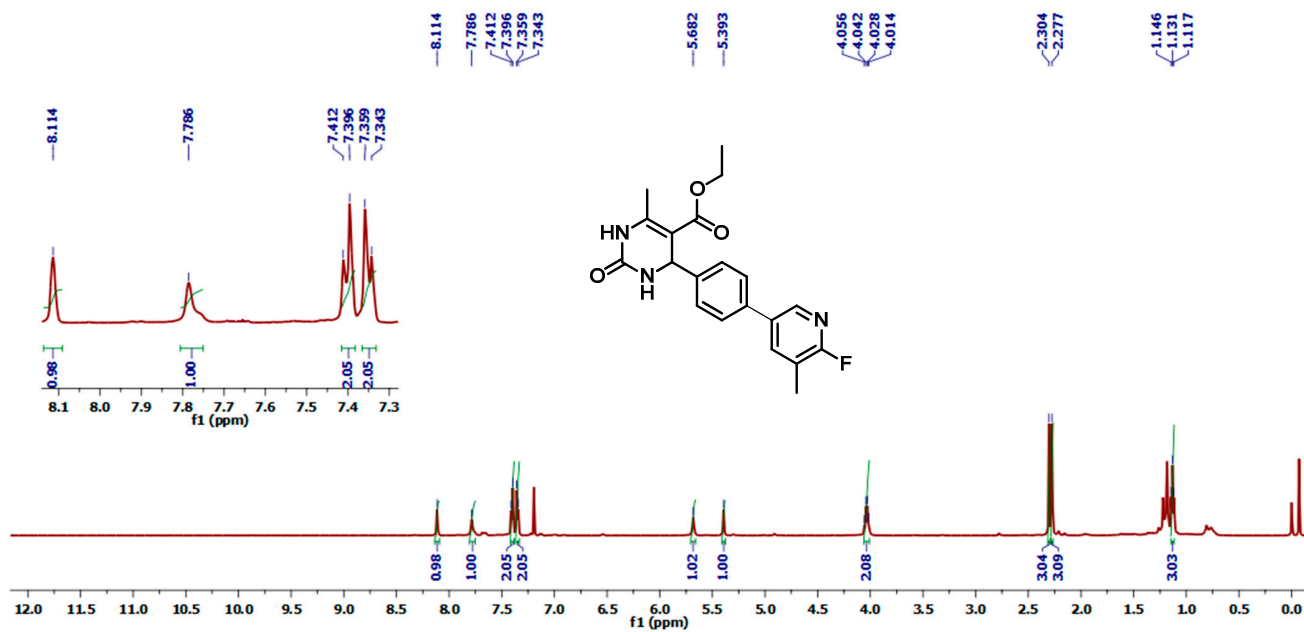

<sup>1</sup>H NMR of 4a

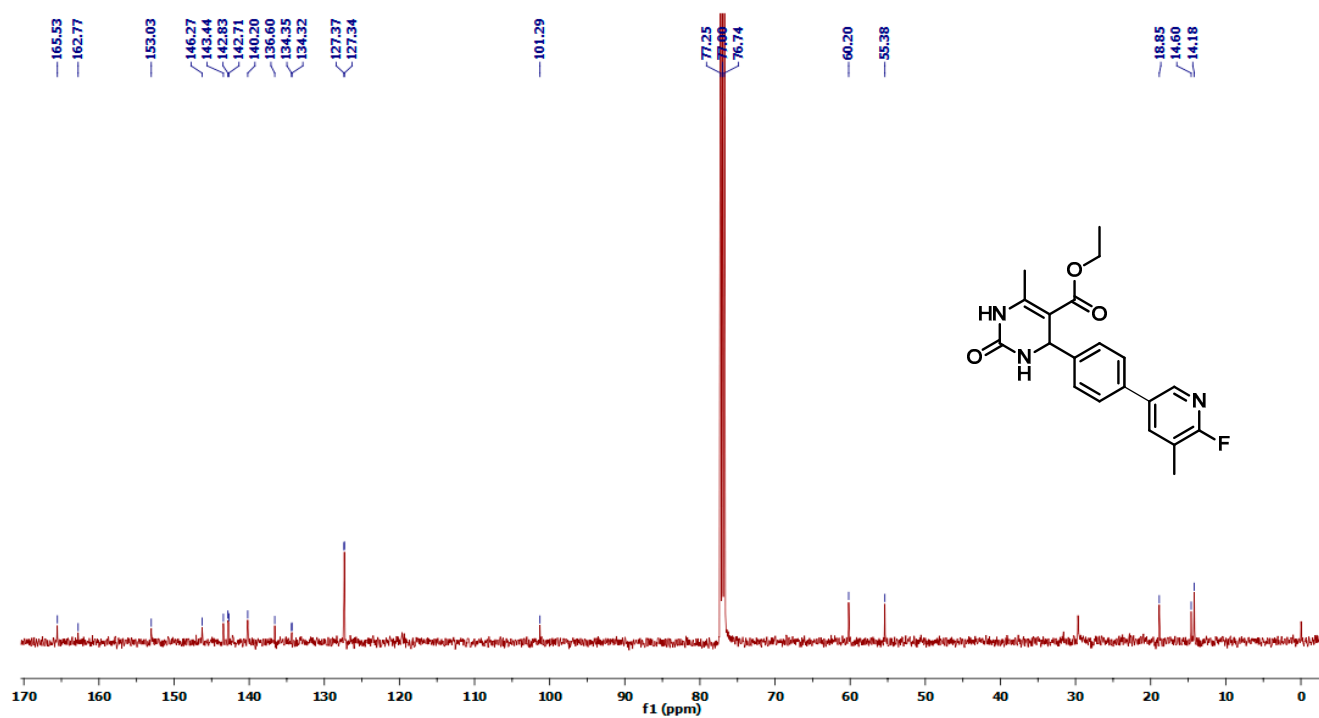

<sup>13</sup>C NMR of 4a

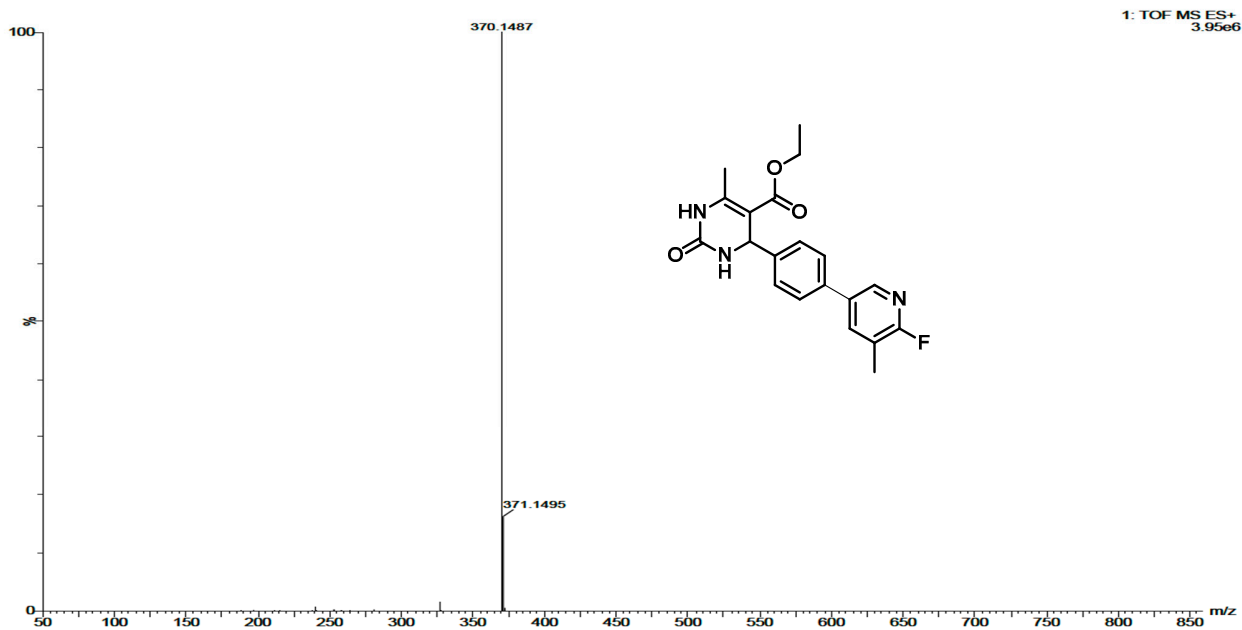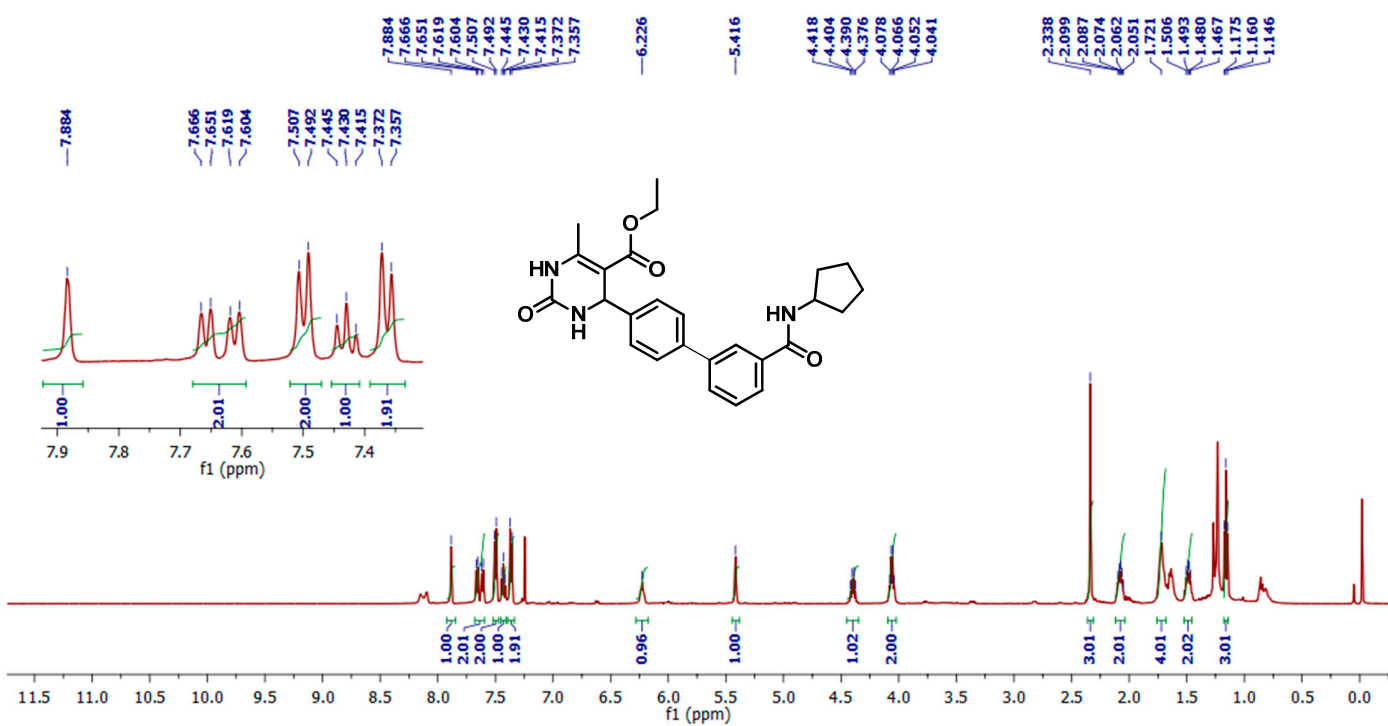

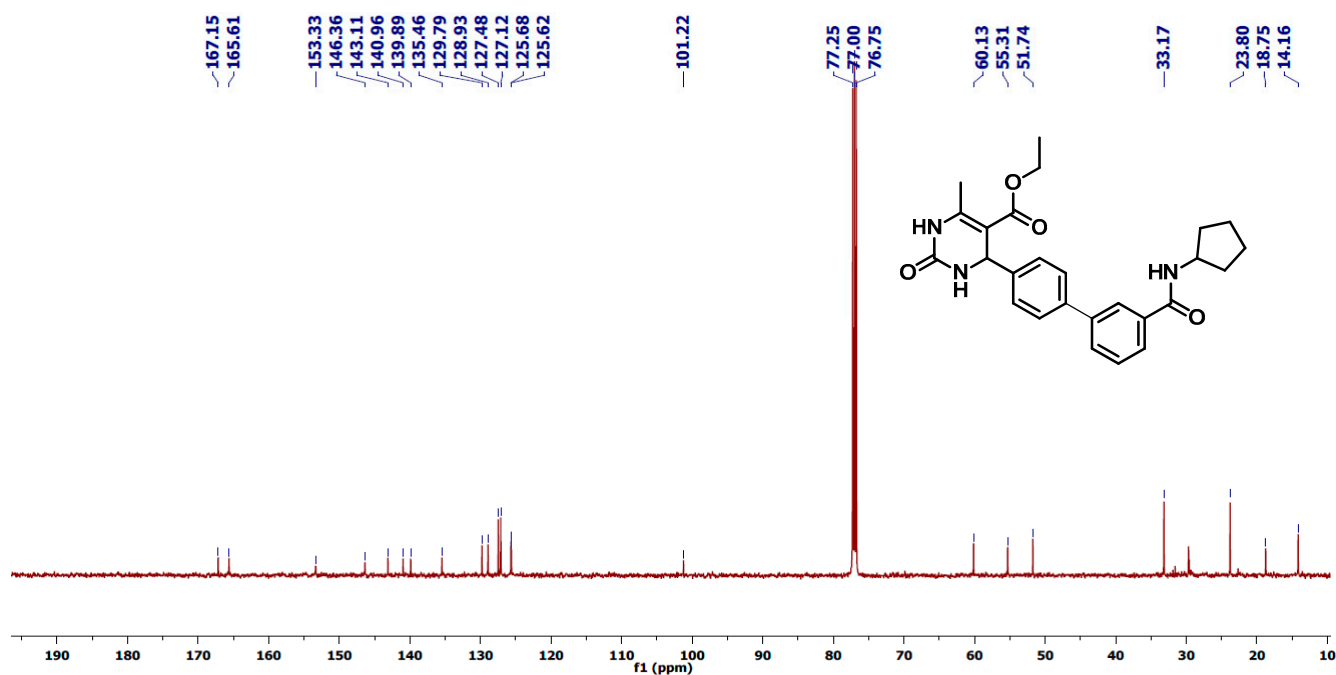

<sup>13</sup>C NMR of 4b

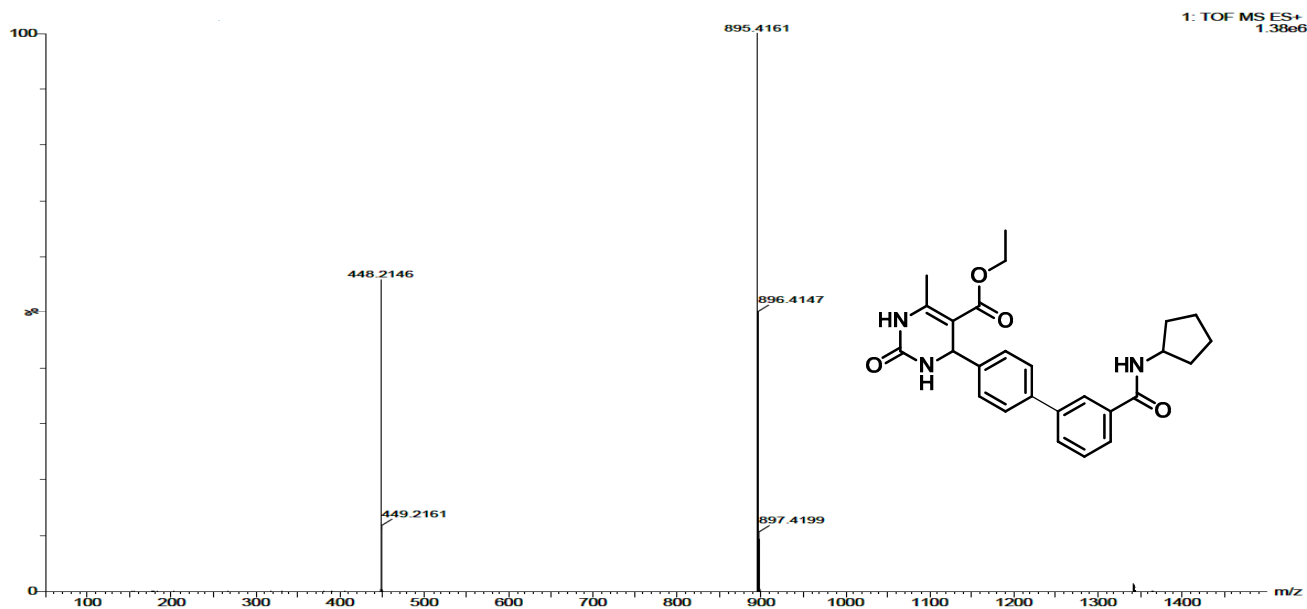

Mass spectrum of 4b

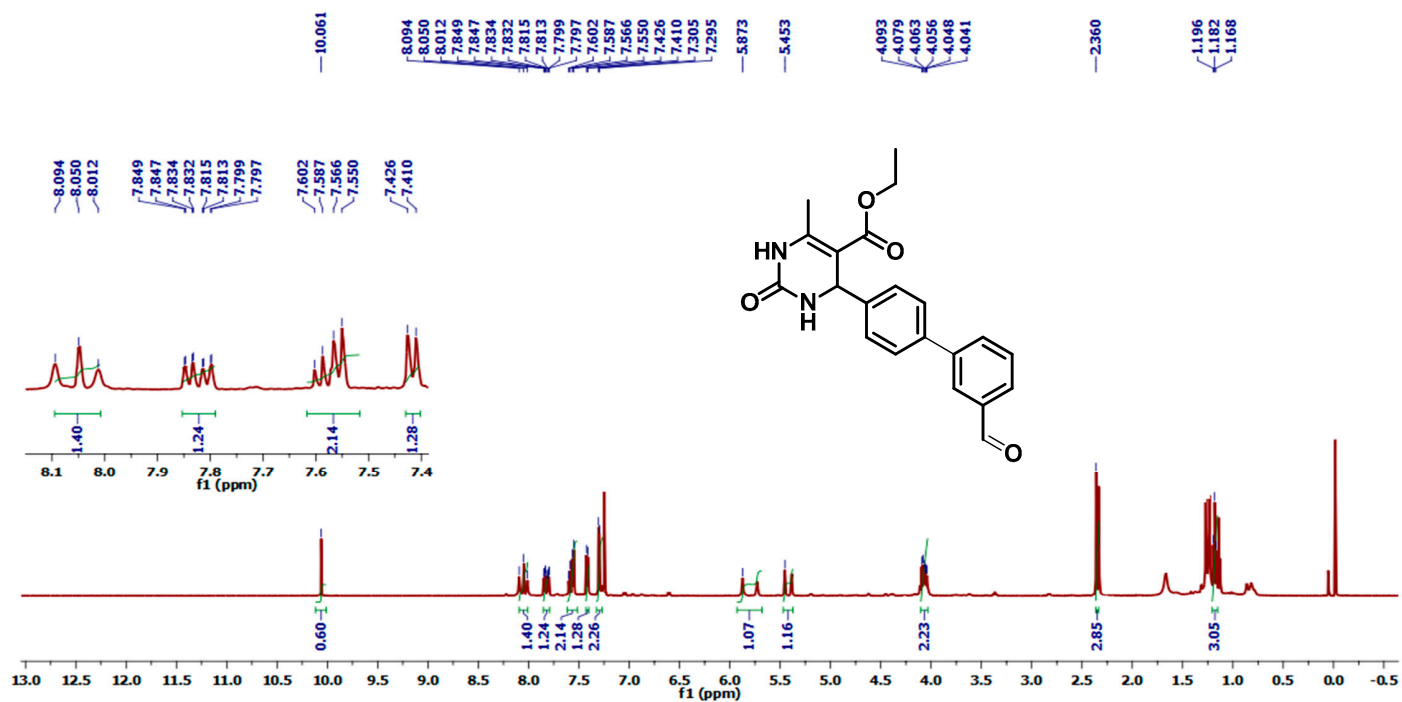

<sup>1</sup>H NMR of 4c

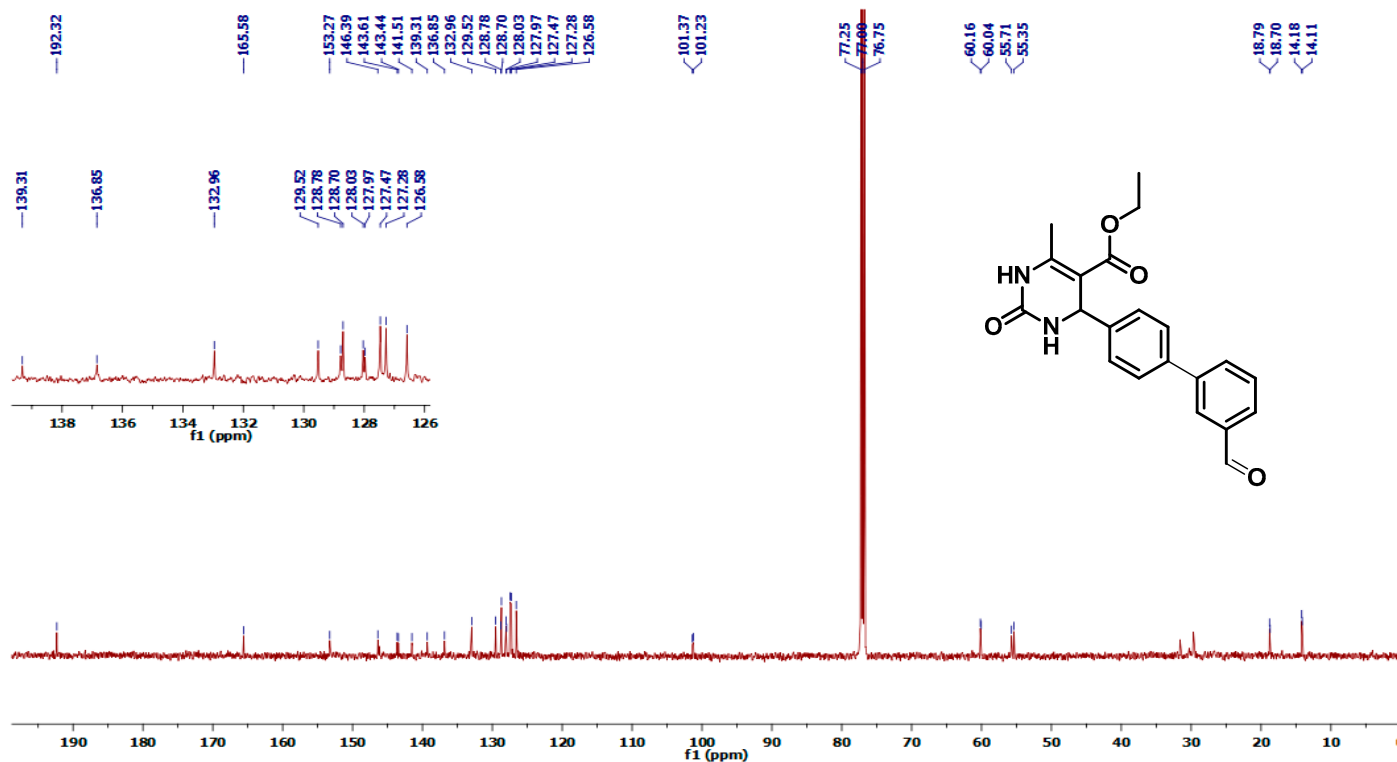

<sup>13</sup>C NMR of 4c

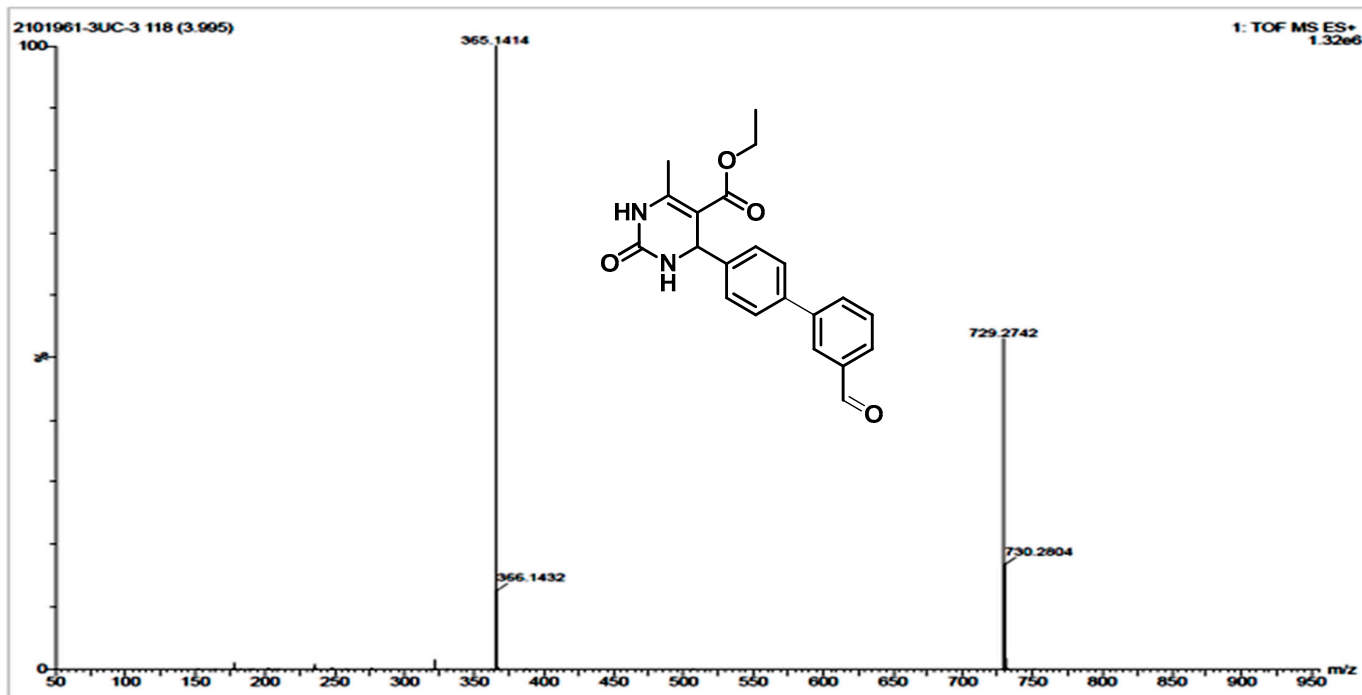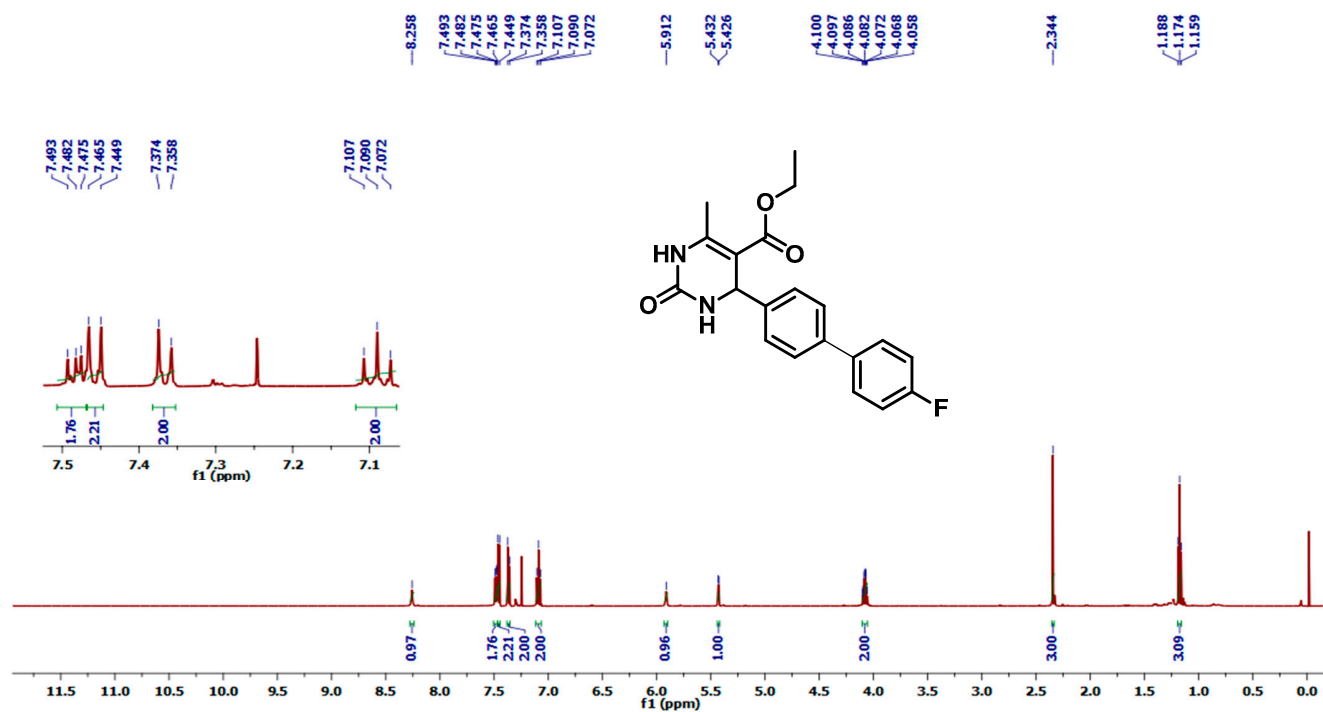

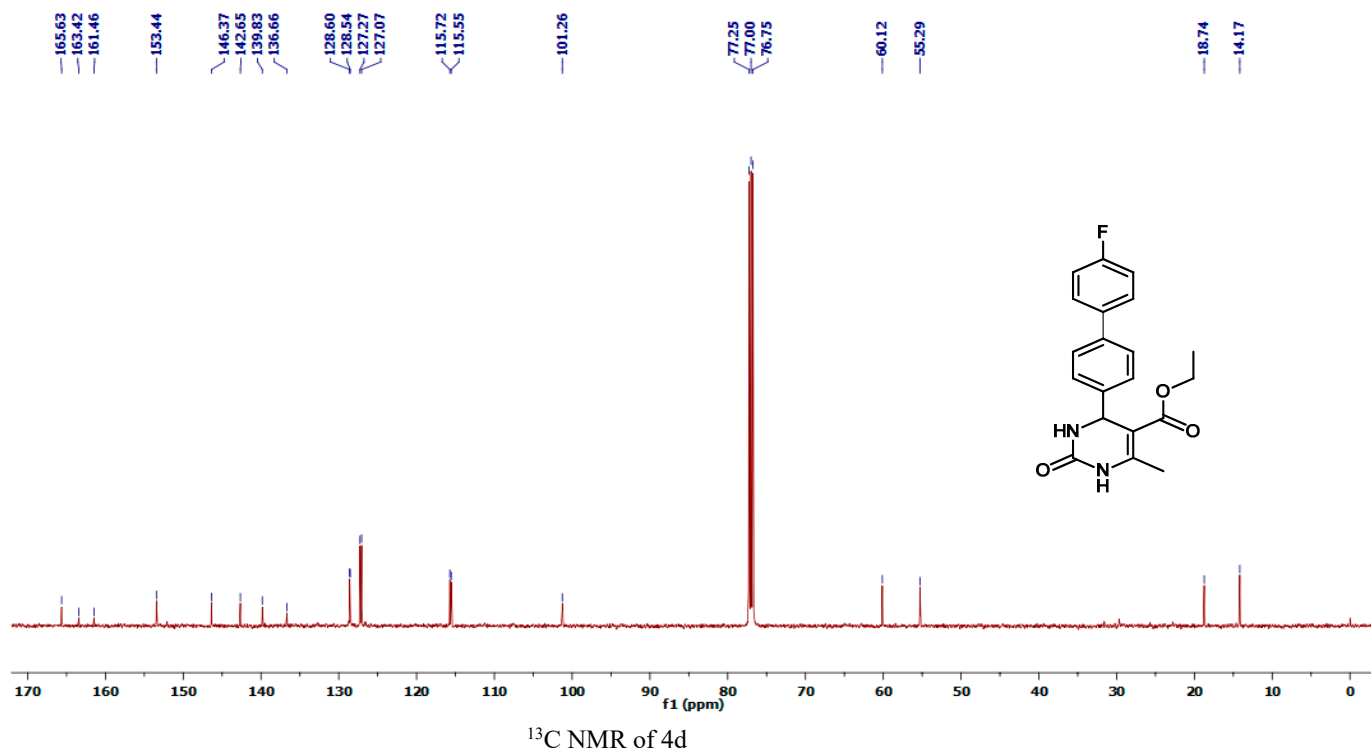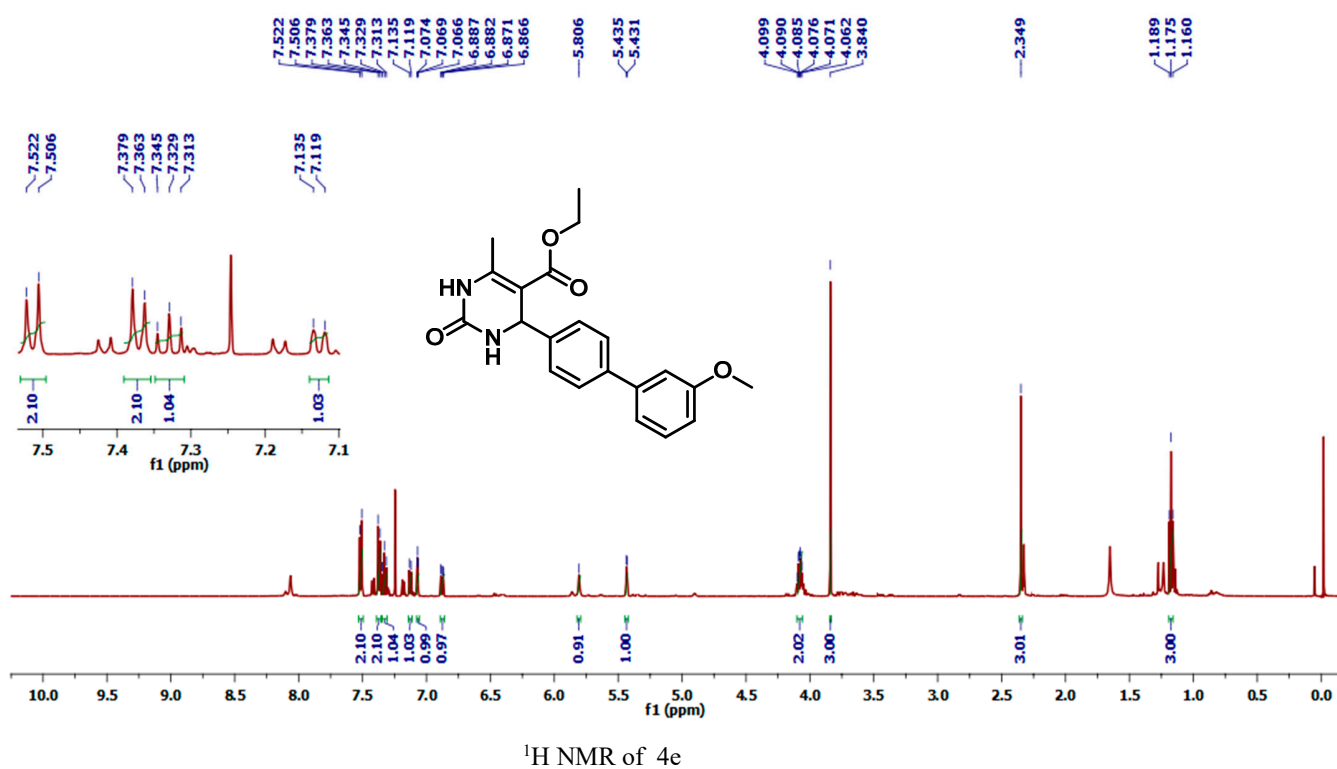

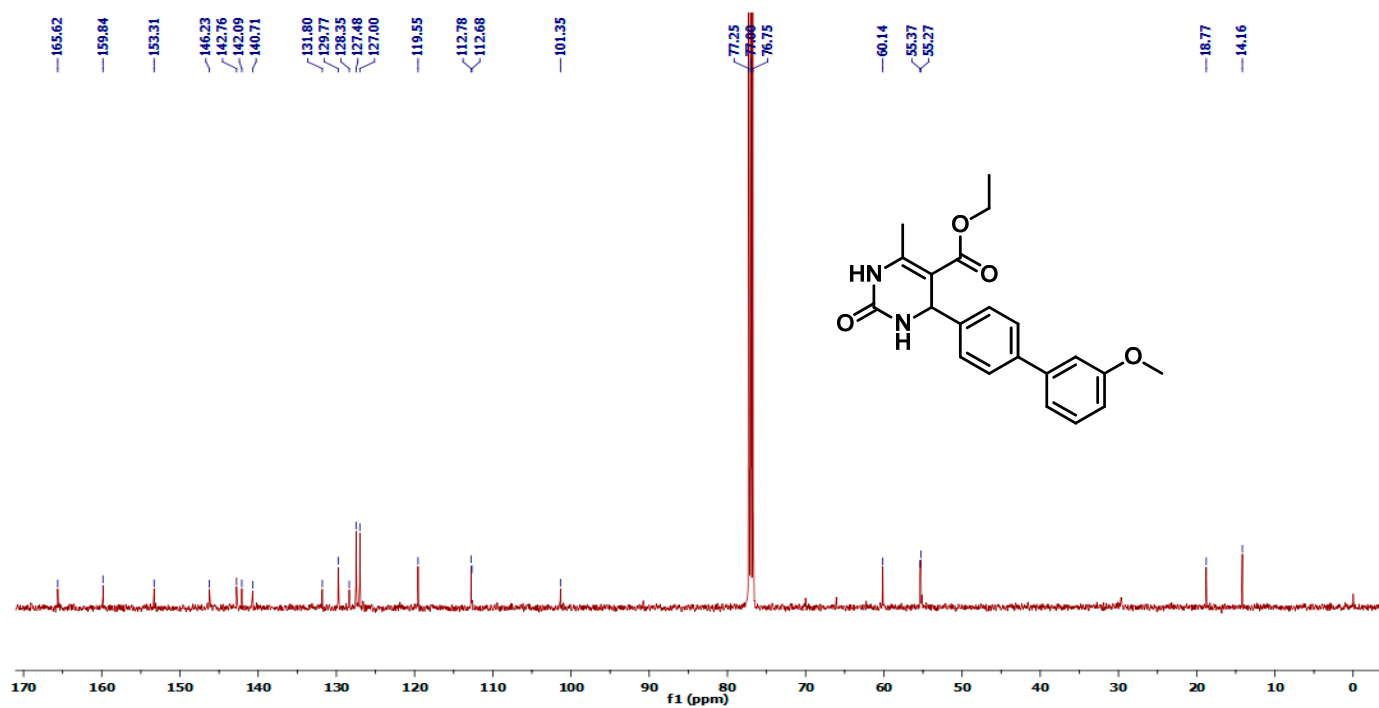

$^{13}\text{C}$  NMR of 4e

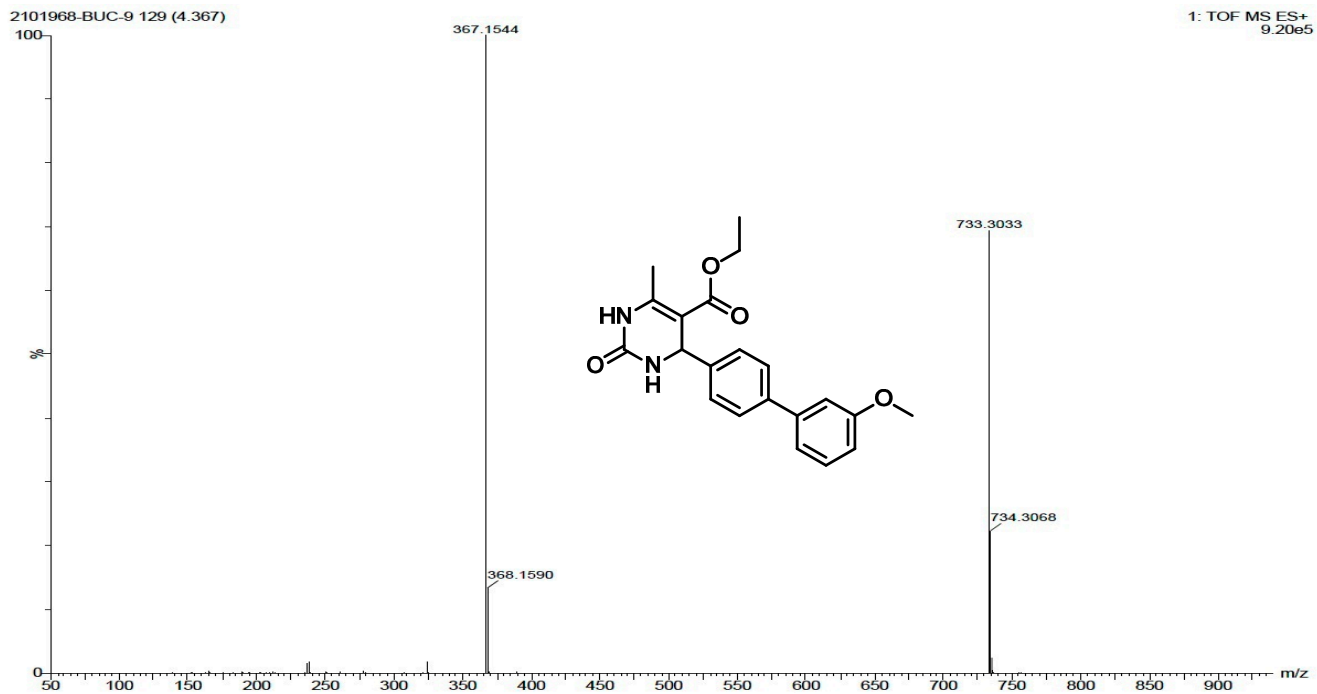

Mass spectrum of 4e



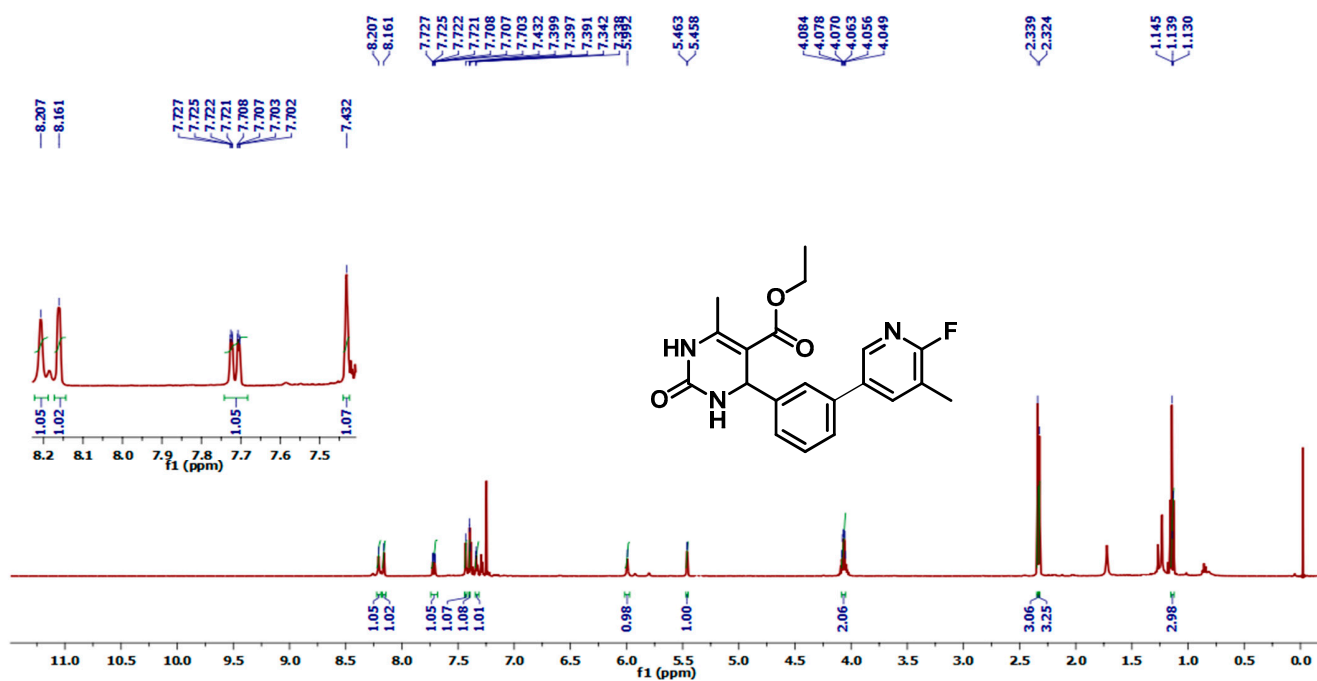

<sup>1</sup>H NMR of 4f

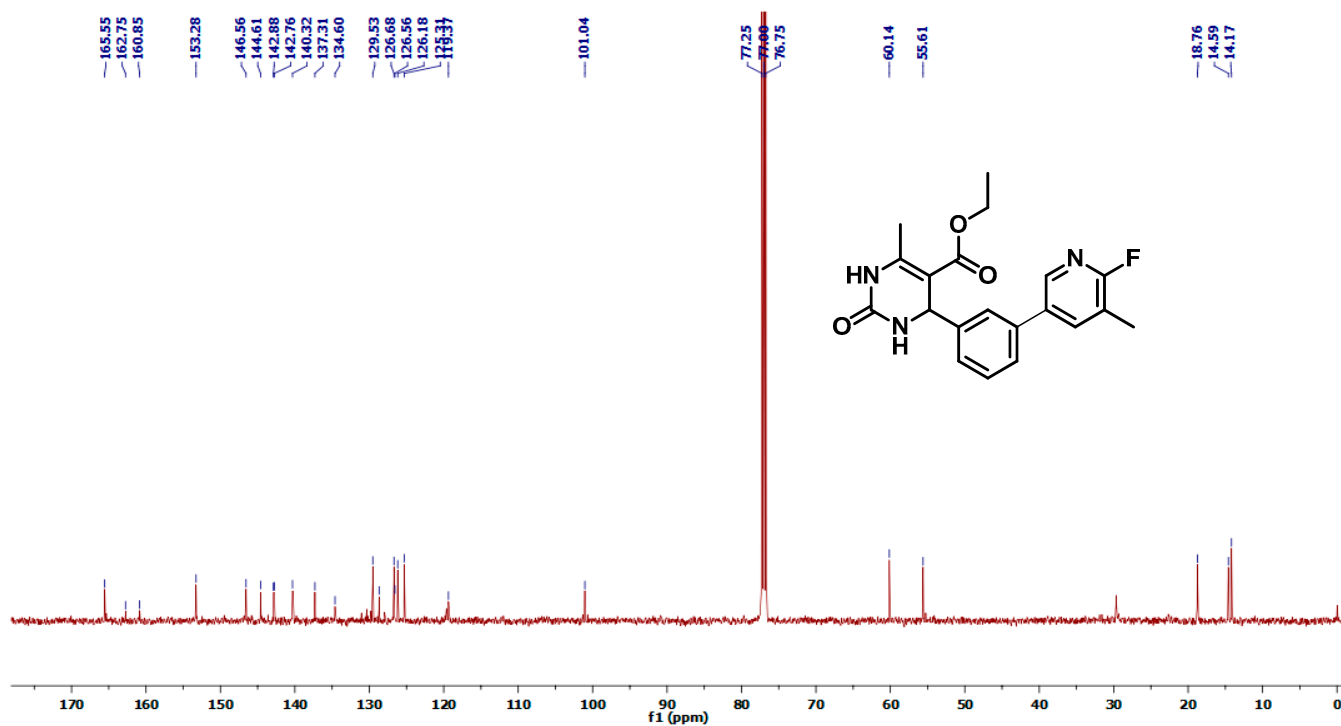

<sup>13</sup>C NMR of 4f

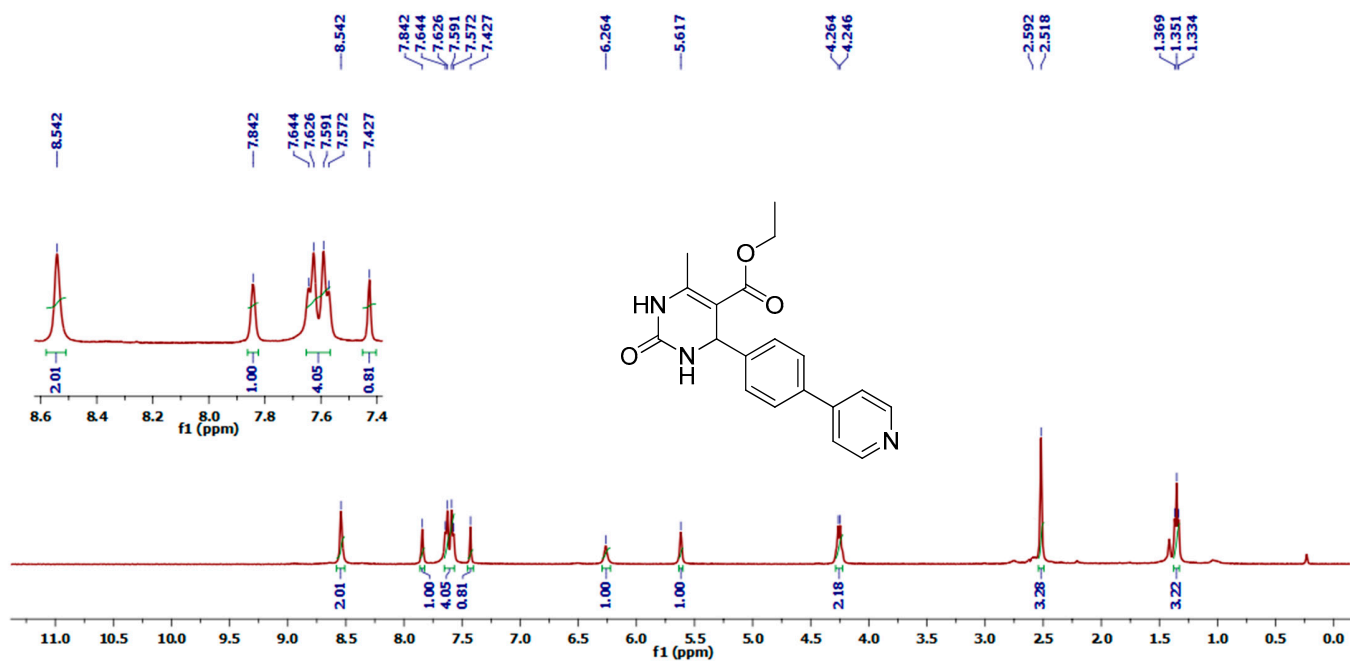

<sup>1</sup>H NMR of 4g

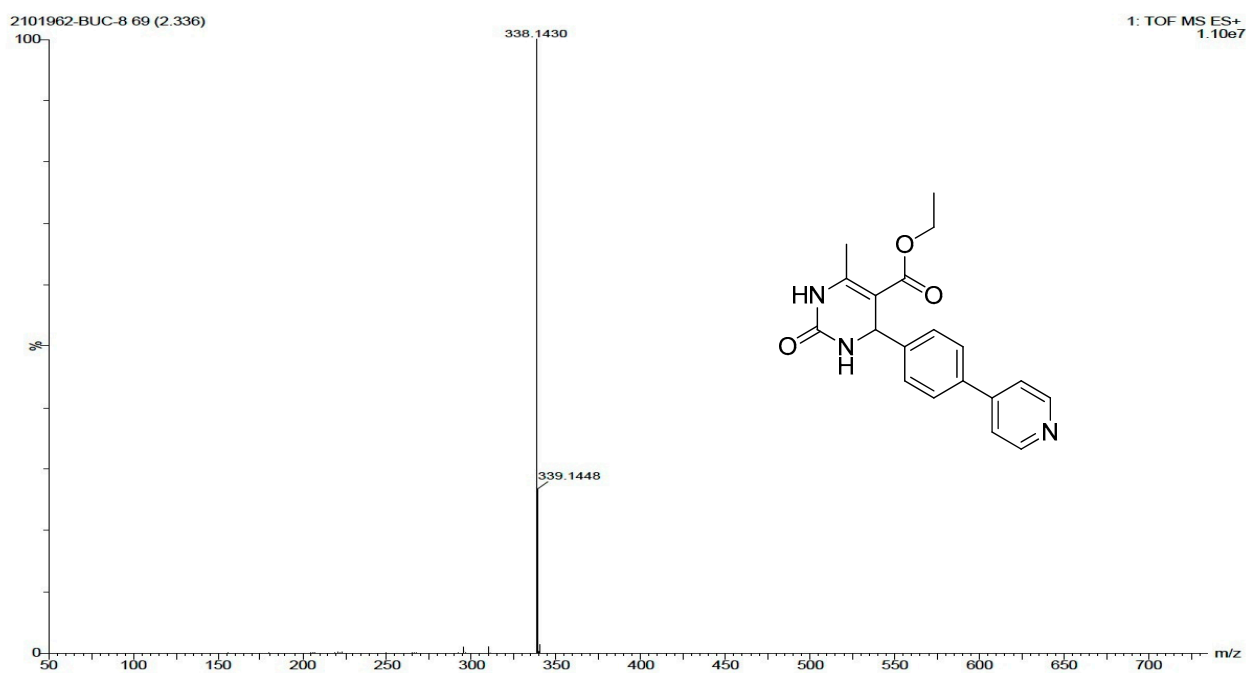

Mass spectrum of 4g

## Log curves of synthesized compounds on MCF-7 cancer cells

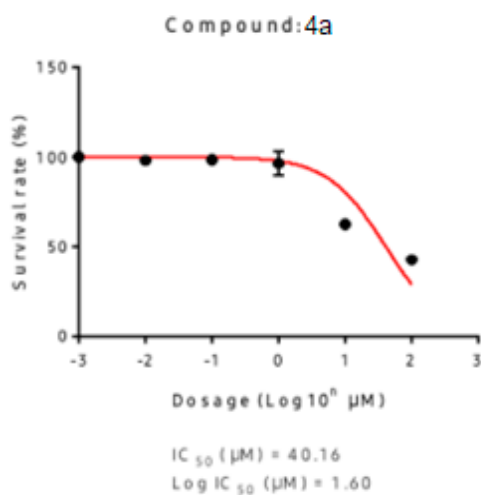

- Cell line: MCF-7 (2000 cells/per well)(96-well plate)
- Treated time: 72hrs
- Assay: alamarBlue (4hrs incubated)
- Data: **4a**

| Conc. ( $\mu\text{M}$ ) | Viability |           |
|-------------------------|-----------|-----------|
|                         | AVE.      | $\pm$ SD. |
| 0                       | 100.00    | 1.37      |
| 0.01                    | 97.90     | 0.84      |
| 0.1                     | 98.04     | 2.17      |
| 1                       | 96.34     | 6.35      |
| 10                      | 62.47     | 0.75      |
| 100                     | 42.56     | 2.76      |

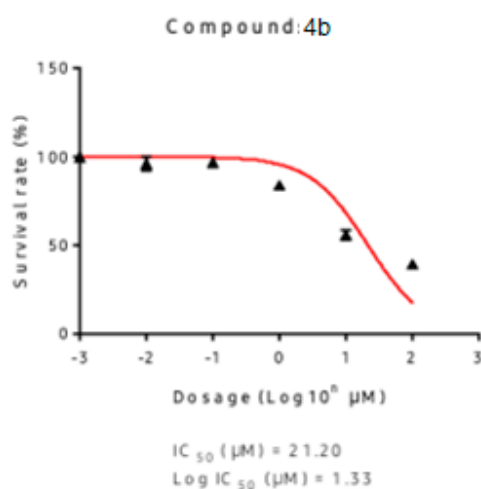

- Cell line: MCF-7 (2000 cells/per well)(96-well plate)
- Treated time: 72hrs
- Assay: alamarBlue (4hrs incubated)
- Data: **4b**

| Conc. ( $\mu\text{M}$ ) | Viability |           |
|-------------------------|-----------|-----------|
|                         | AVE.      | $\pm$ SD. |
| 0                       | 100.00    | 1.37      |
| 0.01                    | 95.93     | 3.96      |
| 0.1                     | 96.95     | 2.24      |
| 1                       | 83.95     | 2.55      |
| 10                      | 55.86     | 3.11      |
| 100                     | 39.26     | 1.96      |

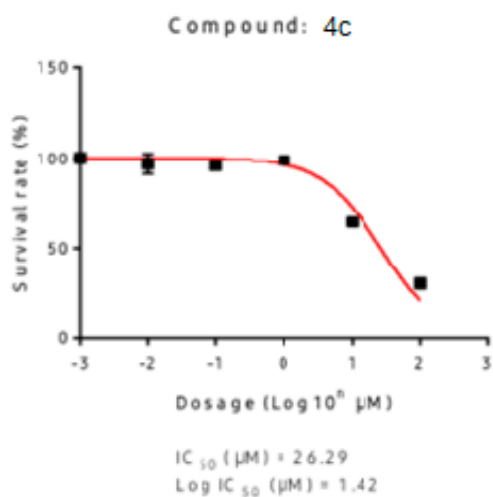

- Cell line: MCF-7 (2000 cells/per well)<sup>(96-well plate)</sup>
- Treated time: 72hrs
- Assay: alamarBlue (4hrs incubated)
- Data: **4c**

| Conc. ( $\mu\text{M}$ ) | Viability |           |
|-------------------------|-----------|-----------|
|                         | AVE.      | $\pm$ SD. |
| 0                       | 100.00    | 1.37      |
| 0.01                    | 96.82     | 5.77      |
| 0.1                     | 95.83     | 0.88      |
| 1                       | 98.71     | 1.99      |
| 10                      | 64.39     | 1.99      |
| 100                     | 30.17     | 0.29      |

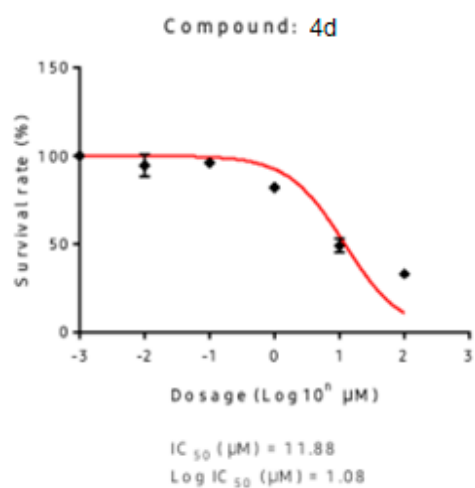

- Cell line: MCF-7 (2000 cells/per well)<sup>(96-well plate)</sup>
- Treated time: 72hrs
- Assay: alamarBlue (4hrs incubated)
- Data: **4d**

| Conc. ( $\mu\text{M}$ ) | Viability |           |
|-------------------------|-----------|-----------|
|                         | AVE.      | $\pm$ SD. |
| 0                       | 100.00    | 2.67      |
| 0.01                    | 94.40     | 6.18      |
| 0.1                     | 95.84     | 0.41      |
| 1                       | 81.90     | 2.18      |
| 10                      | 48.82     | 4.06      |
| 100                     | 33.05     | 1.34      |

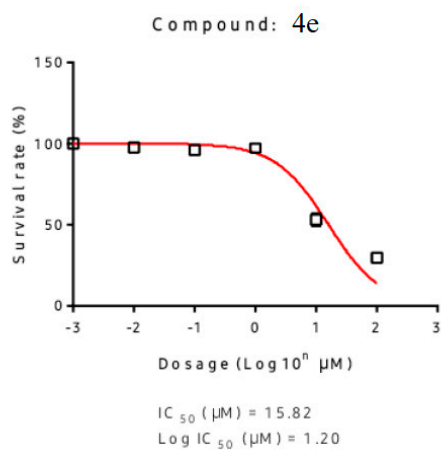

- Cell line: MCF-7 (2000 cells/per well<sup>96</sup>-well plate)
- Treated time: 72hrs
- Assay: alamarBlue (4hrs incubated)
- Data: **4e**

| Conc. ( $\mu\text{M}$ ) | Viability |           |
|-------------------------|-----------|-----------|
|                         | AVE.      | $\pm$ SD. |
| 0                       | 100.00    | 2.67      |
| 0.01                    | 97.27     | 1.95      |
| 0.1                     | 95.85     | 0.79      |
| 1                       | 97.20     | 0.95      |
| 10                      | 52.82     | 3.80      |
| 100                     | 29.38     | 0.33      |

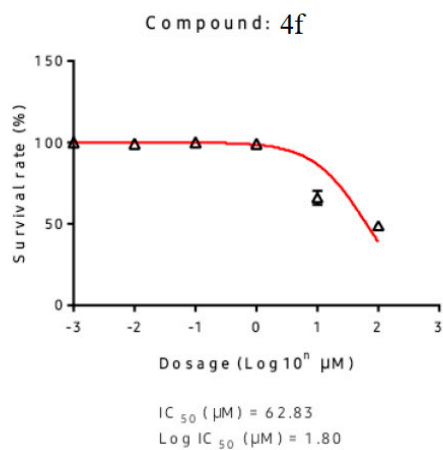

- Cell line: MCF-7 (2000 cells/per well<sup>96</sup>-well plate)
- Treated time: 72hrs
- Assay: alamarBlue (4hrs incubated)
- Data: **4f**

| Conc. ( $\mu\text{M}$ ) | Viability |           |
|-------------------------|-----------|-----------|
|                         | AVE.      | $\pm$ SD. |
| 0                       | 100.00    | 2.67      |
| 0.01                    | 99.32     | 2.76      |
| 0.1                     | 99.75     | 1.59      |
| 1                       | 98.99     | 2.07      |
| 10                      | 65.97     | 4.16      |
| 100                     | 48.70     | 1.18      |

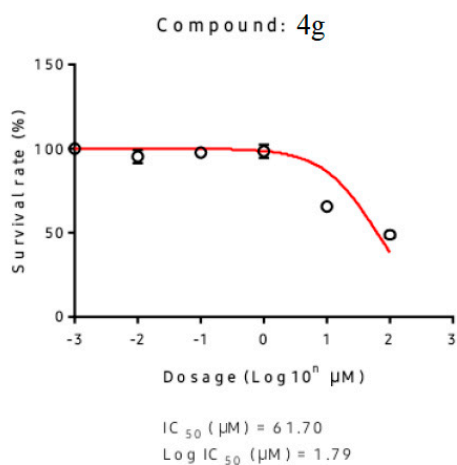

- Cell line: MCF-7 (2000 cells/per well<sup>96</sup>-well plate)
- Treated time: 72hrs
- Assay: alamarBlue (4hrs incubated)
- Data: 4g

| Conc. (μM) | Viability |       |
|------------|-----------|-------|
|            | AVE.      | ± SD. |
| 0          | 100.00    | 2.67  |
| 0.01       | 95.15     | 3.83  |
| 0.1        | 97.29     | 2.90  |
| 1          | 98.11     | 4.00  |
| 10         | 65.52     | 1.49  |
| 100        | 48.64     | 1.34  |

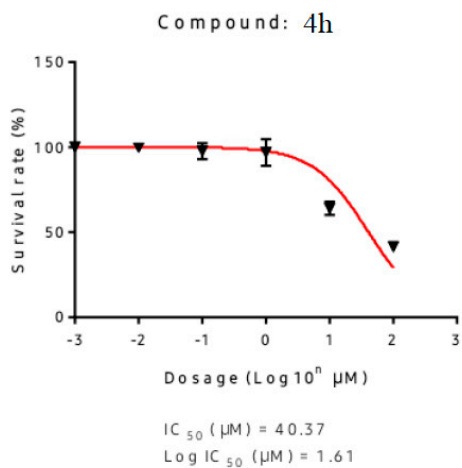

- Cell line: MCF-7 (2000 cells/per well<sup>96</sup>-well plate)
- Treated time: 72hrs
- Assay: alamarBlue (4hrs incubated)
- Data: 4h

| Conc. (μM) | Viability |       |
|------------|-----------|-------|
|            | AVE.      | ± SD. |
| 0          | 100.00    | 1.37  |
| 0.01       | 99.59     | 1.65  |
| 0.1        | 97.56     | 5.02  |
| 1          | 96.84     | 7.48  |
| 10         | 63.92     | 3.71  |
| 100        | 41.48     | 1.91  |

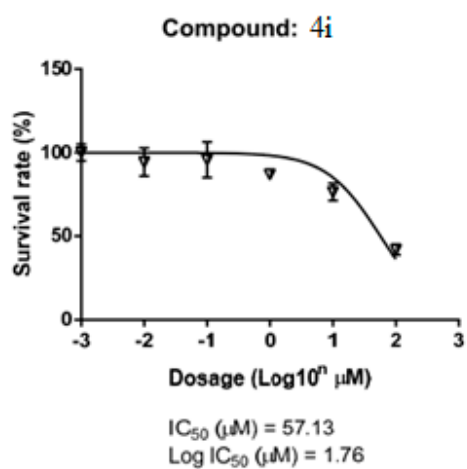

- Cell line: MCF7 (2000 cells/per well<sup>96</sup>)
- Treated time: 72hrs
- Assay: MTT (90mins incubated)
- Data: **4i**

| Conc. ( $\mu\text{M}$ ) | Viability |           |
|-------------------------|-----------|-----------|
|                         | AVE.      | $\pm$ SD. |
| 0                       | 100.00    | 3.60      |
| 0.01                    | 94.29     | 8.45      |
| 0.1                     | 95.68     | 10.61     |
| 1                       | 86.88     | 0.23      |
| 10                      | 76.47     | 5.18      |
| 100                     | 41.95     | 3.09      |

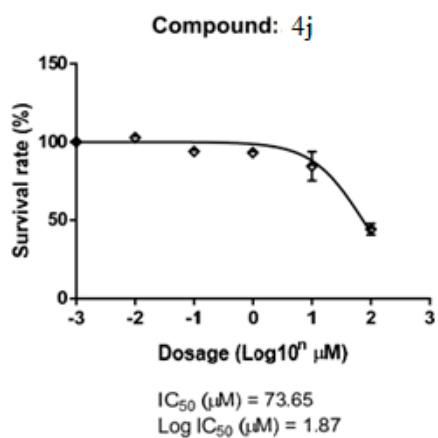

- Cell line: MCF7 (2000 cells/per well<sup>96</sup>)
- Treated time: 72hrs
- Assay: MTT (90mins incubated)
- Data: **4j**

| Conc. ( $\mu\text{M}$ ) | Viability |           |
|-------------------------|-----------|-----------|
|                         | AVE.      | $\pm$ SD. |
| 0                       | 100.00    | 1.62      |
| 0.01                    | 102.77    | 2.87      |
| 0.1                     | 93.87     | 2.58      |
| 1                       | 93.21     | 1.22      |
| 10                      | 84.52     | 9.35      |
| 100                     | 44.26     | 3.62      |

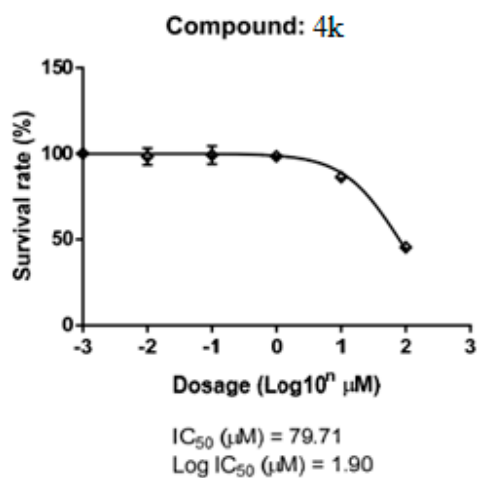

- Cell line: MCF7 (2000 cells/per well<sup>96</sup>)
- Treated time: 72hrs
- Assay: MTT (90mins incubated)
- Data: **4k**

| Conc. ( $\mu\text{M}$ ) | Viability |           |
|-------------------------|-----------|-----------|
|                         | AVE.      | $\pm$ SD. |
| 0                       | 100.00    | 1.62      |
| 0.01                    | 98.37     | 4.92      |
| 0.1                     | 99.22     | 5.29      |
| 1                       | 98.42     | 1.61      |
| 10                      | 86.25     | 2.58      |
| 100                     | 45.42     | 2.66      |

### Log curves of synthesized compounds on MCF-10A non-cancerous cells

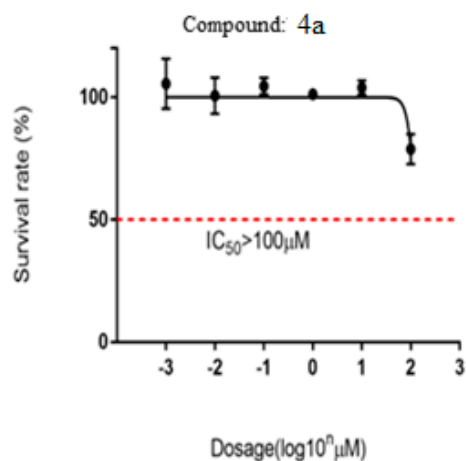

- Cell line: MCF10A(2000cells/per well<sup>96</sup>-well plate)
- Treated time: 72hrs
- Assay: alamarBlue(4hrs incubated)
- Data: **4a**

| Conc. ( $\mu\text{M}$ ) | Viability |          |
|-------------------------|-----------|----------|
|                         | AVE.      | $\pm$ SD |
| 0                       | 100       | 10.16    |
| 0.01                    | 100.66    | 7.37     |
| 0.1                     | 104.58    | 3.49     |
| 1                       | 101.29    | 0.89     |
| 10                      | 103.92    | 2.89     |
| 100                     | 78.89     | 6.17     |



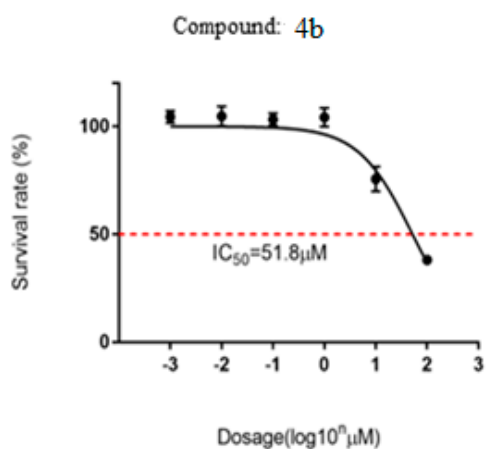

- Cell line: MCF10A(2000cells/per well<sup>96-well plate</sup>)
- Treated time: 72hrs
- Assay: alamarBlue(4hrs incubated)
- Data: **4b**

| Conc.( $\mu\text{M}$ ) | Viability |                |
|------------------------|-----------|----------------|
|                        | AVE.      | $\pm\text{SD}$ |
| 0                      | 100       | 4.59           |
| 0.01                   | 104.72    | 4.59           |
| 0.1                    | 103.27    | 2.95           |
| 1                      | 104.27    | 4.32           |
| 10                     | 75.6      | 5.78           |
| 100                    | 38.18     | 2.14           |

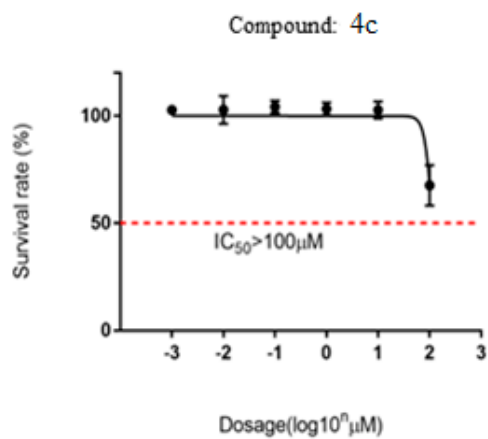

- Cell line: MCF10A(2000cells/per well<sup>96-well plate</sup>)
- Treated time: 72hrs
- Assay: alamarBlue(4hrs incubated)
- Data: **4c**

| Conc.( $\mu\text{M}$ ) | Viability |                |
|------------------------|-----------|----------------|
|                        | AVE.      | $\pm\text{SD}$ |
| 0                      | 100       | 1.45           |
| 0.01                   | 102.84    | 6.47           |
| 0.1                    | 104.29    | 2.9            |
| 1                      | 103.26    | 2.98           |
| 10                     | 102.75    | 3.99           |
| 100                    | 67.61     | 9.47           |

Compound: **4d**

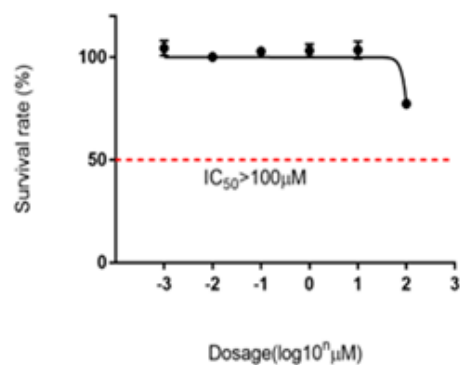

- Cell line: MCF10A(2000cells/per well<sup>96-well plate</sup>)
- Treated time: 72hrs
- Assay: alamarBlue(4hrs incubated)
- Data: **4d**

| Conc.( $\mu\text{M}$ ) | Viability |                |
|------------------------|-----------|----------------|
|                        | AVE.      | $\pm\text{SD}$ |
| 0                      | 100       | 3.65           |
| 0.01                   | 100.19    | 1.69           |
| 0.1                    | 102.82    | 1.85           |
| 1                      | 103.27    | 3.16           |
| 10                     | 103.58    | 4.22           |
| 100                    | 77.33     | 2.32           |

Compound: **4e**

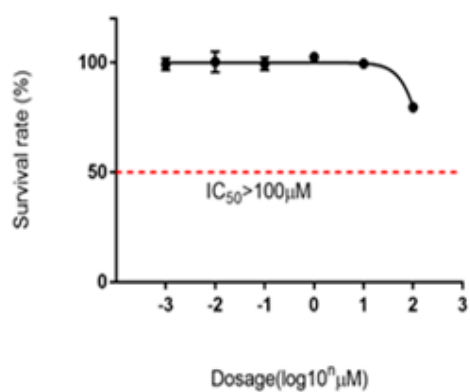

- Cell line: MCF10A(2000cells/per well<sup>96-well plate</sup>)
- Treated time: 72hrs
- Assay: alamarBlue(4hrs incubated)
- Data: **4e**

| Conc.( $\mu\text{M}$ ) | Viability |                |
|------------------------|-----------|----------------|
|                        | AVE.      | $\pm\text{SD}$ |
| 0                      | 100       | 2.77           |
| 0.01                   | 10.36     | 4.66           |
| 0.1                    | 99.50     | 2.98           |
| 1                      | 102.57    | 0.46           |
| 10                     | 99.57     | 1.52           |
| 100                    | 79.67     | 1.93           |
